# Supplementary material for: Sustained expression of HeyL is critical for the proliferation of muscle stem cells in overloaded muscle
Source: eLife. 2019 Sep 23;8:e48284. doi: 10.7554/eLife.48284 (PMC6768661; doi:10.7554/eLife.48284)
Supplement: Figure 1—source data 1. — Experiment number corresponds to all results. [file elife-48284-fig1-data1.xlsx]

## Sheet: Fig1
Fig1B		plantaris/BW (mg/g)
		Day2			Day4			Day7			Day14
		Sham	ope		Sham	ope		Sham	ope		Sham	ope
	Exp.4	0.60173	0.808575	Exp.2	0.692432	0.897746	Exp.1	0.689655	0.927203	Exp.3	0.661821	0.899005
		0.641227	0.841857		0.620661	0.837076		0.640488	0.899733		0.593505	0.817469
		0.693416	0.775224					0.680328	0.954918		0.656238	0.858451
		0.705568	0.755149					0.639344	0.922131		0.65095	0.717804
	Exp.7	0.654989	0.761615	Exp.5	0.645718	0.921961	Exp.6	0.735869	0.878066	Exp.8	0.622554	0.811099
		0.668716	0.84166		0.713529	0.921936		0.641466	0.862925		0.636917	0.803245
		0.607827	0.786844		0.600288	0.801582		0.660128	0.905319		0.663363	0.743424
		0.673772	0.780358		0.651236	0.819929					0.68836	0.896955
		0.637876	0.796355
	average	0.653903	0.794182	average	0.653977	0.866705	average	0.669611	0.907185	average	0.646714	0.818432
	SD	0.0355468	0.0314792	SD	0.0426459	0.0536173	SD	0.0354801	0.0310066	SD	0.0289318	0.0657885
		F-test	0.739307		F-test	0.627587		F-test	0.751806		F-test	0.0456647
			Student			Student			Student			Welch
		p-value	1.43226e-07		p-value	1.82766e-05		p-value	1.47465e-08		p-value	6.05492e-05
		Statistics	**		Statistics	**		Statistics	**		Statistics	**
Fig1D		Relative Pax7+ cells /section
		Day2			Day4			Day7			Day14
		Sham	ope		Sham	ope		Sham	ope		Sham	ope
	Exp.4	0.874286	0.565714	Exp.2	0.816754	1.03665	Exp.1	1.14545	1.27273	Exp.3	1.26061	1.01818
		0.822857	1.28571		1.41361	1.03665		0.806061	2.16364		1.45455	0.775758
		0.771429	1.02857					1.35758	1.73939		1.06667	0.727273
		1.28571	0.874286					0.933333	1.35758		0.921212	1.26061
	Exp.7	1.69714	1.74857	Exp.5	0.848168	1.41361	Exp.6	0.721212	1.10303	Exp.8	0.872727	1.21212
		0.925714	1.18286		1.00524	1.1623		1.10303	1.86667		1.06667	1.35758
		0.72	0.874286		1.00524	1.69634		0.933333	2.03636		0.630303	1.74545
		0.977143	1.33714		0.910995	1.28796					0.727273	1.01818
		0.925714	1.23429
	average	1	1.12571	average	1	1.27225	average	1	1.64848	average	1	1.13939
	SD	0.307618	0.339628	SD	0.21711	0.254237	SD	0.217507	0.407235	SD	0.271735	0.330876
		F-test	0.786248		F-test	0.737456		F-test	0.152342		F-test	0.616209
			Student			Student			Student			Student
		p-value	0.422583		p-value	0.0740394		p-value	0.0029469		p-value	0.372729
		Statistics	N.S.		Statistics	N.S.		Statistics	**		Statistics	N.S.
Fig1E		Pax7+ Ki67+ cells /Pax7+ cells (%)
		Day2			Day4			Day7			Day14
		Sham	ope		Sham	ope		Sham	ope		Sham	ope
	Exp.4	0	36.3636	Exp.2	0	84.8485	Exp.1	8	50	Exp.3	0	0
		0	24		0	66.6667		11.7647	39.2157		0	0
		0	10					6.66667	36.5854		0	0
		0	29.4118					4.7619	59.375		0	0
	Exp.7	0	2.94118	Exp.5	0	71.1111	Exp.6	0	30.7692	Exp.8	0	0
		0	0		0	67.5676		0	38.6364		0	7.14286
		0	5.88235		0	74.0741		0	64.5833		0	2.77778
		0	11.5385		0	51.2195					0	14.2857
		0	12.5
	average	0	14.7375	average	0	69.2479	average	4.45618	45.595	average	0	3.02579
	SD	0	12.4562	SD	0	10.9968	SD	4.66415	12.6487	SD	0	5.20405
		F-test	0		F-test	0		F-test	0.0284352		F-test	0
			Welch			Welch			Welch			Welch
		p-value	0.00751575		p-value	2.07906e-05		p-value	4.08784e-05		p-value	0.144064
		Statistics	**		Statistics	**		Statistics	**		Statistics	N.S.
Fig1F		Pax7+ MyoD+ cells /Pax7+ cells (%)
		Day2			Day4			Day7			Day14
		Sham	ope		Sham	ope		Sham	ope		Sham	ope
	Exp.4	0	16.6667	Exp.2	11.1111	46.1538	Exp.1	4.7619	27.027	Exp.3	0	0
		0	12.5		21.0526	35.4839		9.09091	19.3548		0	0
		7.69231	50					5.88235	25.4902		0	0
		0	42.1053					4.16667	42.8571		0	0
	Exp.7	0	34.6154	Exp.5	0	42.1053	Exp.6	0	29.1667	Exp.8	0	0
		0	7.40741		0	42.8571		0	31.3725		0	0
		0	22.2222		0	34.6939		0	49.0196		0	0
		0	26.087		0	14.2857					0	0
		0	15.7895
	average	0.854701	25.2659	average	5.36062	35.93	average	3.41455	32.0411	average	0	0
	SD	2.5641	14.3105	SD	8.87978	11.4965	SD	3.55128	10.3518	SD	0	0
		F-test	6.07633e-05		F-test	0.584609		F-test	0.0198168
			Welch			Student			Welch			-
		p-value	0.000832231		p-value	0.00042854		p-value	0.000176658
		Statistics	**		Statistics	**		Statistics	**
