# Supplementary material for: Sustained expression of HeyL is critical for the proliferation of muscle stem cells in overloaded muscle
Source: eLife. 2019 Sep 23;8:e48284. doi: 10.7554/eLife.48284 (PMC6768661; doi:10.7554/eLife.48284)
Supplement: Figure 2—source data 1. — Experiment number corresponds to all results (Figure 2C). Data in Figure 2-D-F marked by gray color are used for analyses in Figure 2-D-F marked by yellow color. [file elife-48284-fig2-data1.xlsx]

## Sheet: Fig2
Fig2C		Culture
	MyoD+Ki67+	75
	MyoD-Ki67-	0
	MyoD+Ki67-	0
	MyoD-Ki67+	1
	total	76
(%)	MyoD+Ki67+	98.6842
	MyoD-Ki67-	0
	MyoD+Ki67-	0
	MyoD-Ki67+	1.31579
		Exp1	Exp2	Exp3	Exp4
		sham	sham	sham	sham	Sham (total)
	MyoD+Ki67+	0	3	1	0	4
	MyoD-Ki67-	25	106	73	62	266
	MyoD+Ki67-	2	8	3	0	13
	MyoD-Ki67+	0	2	1	1	4
	total	27	119	78	63	287
(%)	MyoD+Ki67+	0	2.52101	1.28205	0	1.39373
	MyoD-Ki67-	92.5926	89.0756	93.5897	98.4127	92.6829
	MyoD+Ki67-	7.40741	6.72269	3.84615	0	4.52962
	MyoD-Ki67+	0	1.68067	1.28205	1.5873	1.39373
		Exp1	Exp2	Exp3	Exp4
		Tenotomy day4	Tenotomy day4	Tenotomy day4	Tenotomy day4	Tenotomy day4 (total)
	MyoD+Ki67+	17	30	23	68	138
	MyoD-Ki67-	32	55	39	91	217
	MyoD+Ki67-	1	2	3	4	10
	MyoD-Ki67+	65	70	66	97	298
	total	115	157	131	260	663
(%)	MyoD+Ki67+	14.7826	19.1083	17.5573	26.1538	20.8145
	MyoD-Ki67-	27.8261	35.0318	29.771	35	32.73
	MyoD+Ki67-	0.869565	1.27389	2.29008	1.53846	1.5083
	MyoD-Ki67+	56.5217	44.586	50.3817	37.3077	44.9472
Fig2D-F
	MyoD- Ki67-				MyoD- Ki67+
	sham	ope			sham	ope
	100	29.4118			0	58.8235
	100	33.3333			0	33.3333
	100	13.6364			0	59.0909
	100	29.4118			0	41.1765
	100	57.1429			0	21.4286
	100	45.4545			0	27.2727
	100	60			0	40
	100	45.4545			0	9.09091
	88.8889	8			0	44
	100	100			0	0
	100	50			0	50
	100	66.6667			0	16.6667
	100	22.2222			0	55.5556
	100	40			0	40
	100	20			0	66.6667
	100	35.7143			0	42.8571
	100	36.3636			0	27.2727
	100	13.6364			0	59.0909
	100	22.2222			0	55.5556
	66.6667	0			0	53.8462
	100	0			0	100
	100	22.2222			0	22.2222
	100	0			0	80
	100	22.2222			0	66.6667
	100	12.5			0	50
	100	10			0	70
	90.9091	20			9.09091	60
	0	11.1111			100	66.6667
	100	0			0	100
	100	6.66667			0	40
	100	40			0	60
	100	16.6667			0	50
	100	22.2222			0	33.3333
	80	20			0	80
	100	33.3333			0	33.3333
	66.6667	0			0	0
	100	0			0	20
	66.6667	40			0	60
	100	7.14286			0	78.5714
	100	50			0	50
	100	0			0	100
		0				78.9474
		0				66.6667
		18.1818				36.3636
		29.4118				35.2941
		33.3333				33.3333
		27.2727				18.1818
		11.1111				33.3333
		6.66667				66.6667
MyoD- Ki67-	sham	ope		MyoD- Ki67+	sham	ope
Data nu,ber	41	49		Data nu,ber	41	49
Average	94.1414	24.2599		Average	2.66075	48.8022
Unbiased dispersion	313.305	438.124		Unbiased dispersion	244.81	580.553
standard deviation	17.7004	20.9314		standard deviation	15.6464	24.0947
Standard error	2.76434	2.9902		Standard error	2.44356	3.4421
Min	0	0		Min	0	0
Max	100	100		Max	100	100
Coefficient of variation	0.188019	0.862799		Coefficient of variation	5.88043	0.493721
Fig2D				Fig2E				Fig2F
	MuSC number	sham	ope		MyoD- Ki67-	sham	ope		MyoD- Ki67+	sham	ope
	0-1	17.3913	4.08163		0-20	1	24		0-20	40	6
	2-3	34.7826	6.12245		20-40	0	17		20-40	0	14
	4-5	19.5652	20.4082		40-60	0	6		40-60	0	16
	6-7	10.8696	6.12245		60-80	4	1		60-80	0	10
	8-9	6.52174	16.3265		80-100	36	1		80-100	1	3
	10-11	10.8696	14.2857		Total	41	49		Total	41	49
	12-13	0	6.12245
	14-15	0	12.2449
	16-17	0	6.12245		MyoD- Ki67-	sham	ope		MyoD- Ki67+	sham	ope
	18-19	0	2.04082		0-20	2.43902	48.9796		0-20	97.561	12.2449
	20-21	0	0		20-40	0	34.6939		20-40	0	28.5714
	22-23	0	4.08163		40-60	0	12.2449		40-60	0	32.6531
	24-25	0	2.04082		60-80	9.7561	2.04082		60-80	0	20.4082
					80-100	87.8049	2.04082		80-100	2.43902	6.12245
