# Supplementary material for: Sustained expression of HeyL is critical for the proliferation of muscle stem cells in overloaded muscle
Source: eLife. 2019 Sep 23;8:e48284. doi: 10.7554/eLife.48284 (PMC6768661; doi:10.7554/eLife.48284)
Supplement: Figure 4—figure supplement 1—source data 1. — Experiment number corresponds to all results. [file elife-48284-fig4-figsupp1-data1.xlsx]

## Sheet: Figure4-figure sup1
B
MyoD- Ki67+
		Cont		Hey1 KO		HeyL KO
		sham	ope	sham	ope	sham	ope
	Exp1			0	30.4582
				1.92308	42.1053
	Exp2					1.88679	29.7619
						7.01754	28.5714
	Exp3	0.869565	28.4519
	Exp4			0	38.1818
	Exp5	3.8835	43.3526
	Exp6					0	21.978
	Exp7	0	37.8788	1.75439	36.7647
	average	1.58435	36.5611	0.919366	36.8775	2.96811	26.7705
	SD	2.03803	7.53725	1.06382	4.8391	3.63159	4.19283
		ANOVA		p-value
				<0.001
		Tukey-Kramer	Statistics	p-value
		C-sham,C-ope	**	<0.001
		C-sham,1-sham	ns	>0.999
		C-sham,1-ope	**	<0.001
		C-sham,L-sham	ns	0.998
		C-sham,L-ope	**	<0.001
		C-ope,1-sham	**	<0.001
		C-ope,1-ope	ns	>0.999
		C-ope,L-sham	**	<0.001
		C-ope,L-ope	ns	0.116
		1-sham,1-ope	**	<0.001
		1-sham,L-sham	ns	0.987
		1-sham,L-ope	**	<0.001
		1-ope,L-sham	**	<0.001
		1-ope,L-ope	ns	0.07
		L-sham,L-ope	**	<0.001
MyoD+ Ki67+
		Cont		Hey1 KO		HeyL KO
		sham	ope	sham	ope	sham	ope
	Exp1			2.17391	19.1375
				1.92308	23.6842
	Exp2					0	38.6905
						10.5263	50
	Exp3	0.869565	10.4603
	Exp4			0	18.7879
	Exp5	2.91262	19.0751
	Exp6					1.78571	25.2747
	Exp7	0	15.6566	0	19.1176
	average	1.26073	15.064	1.02425	20.1818	4.10401	37.9884
	SD	1.49519	4.33791	1.18712	2.34044	5.63309	12.3776
		ANOVA		p-value
				<0.001
		Tukey-Kramer	Statistics	p-value
		C-sham,C-ope	ns	0.076
		C-sham,1-sham	ns	>0.999
		C-sham,1-ope	**	0.006
		C-sham,L-sham	ns	0.987
		C-sham,L-ope	**	<0.001
		C-ope,1-sham	*	0.048
		C-ope,1-ope	ns	0.827
		C-ope,L-sham	ns	0.216
		C-ope,L-ope	**	0.002
		1-sham,1-ope	**	0.003
		1-sham,L-sham	ns	0.975
		1-sham,L-ope	**	<0.001
		1-ope,L-sham	*	0.02
		1-ope,L-ope	**	0.009
		L-sham,L-ope	**	<0.001
C
Ki67+, MyoD+/Ki67+, MyoD-
		Cont	Hey1KO	HeyL KO
	Exp1		0.628319
			0.5625
	Exp2			1.3
				1.75
	Exp3	0.367647
	Exp4		0.492063
	Exp5	0.44
	Exp6			1.15
	Exp7	0.413333	0.52
	average	0.406993	0.550721	1.4
	SD	0.0365907	0.0592863	0.31225
		ANOVA		p-value
				<0.001
		Tukey-Kramer	Statistics	p-value
		Cont,Hey1 KO	ns	0.549
		Cont,Hey L KO	**	<0.001
		Hey1 KO,Hey L KO	**	<0.001
D
Pax7+/fiber
		Cont		Hey1 KO		HeyL KO
		sham	ope	sham	ope	sham	ope
	Exp1			4	15.4583
				4	7.6
	Exp2					4.07692	6.22222
						2.28	2.94737
	Exp3	4.42308	8.85185
	Exp4			4.24	7.85714
	Exp5	3.81481	7.86364
	Exp6					2.07407	6.06667
	Exp7	2.76	9	2.19231	7.28571
	average	3.66596	8.57183	3.60808	9.5503	2.81033	5.07875
	SD	0.841471	0.61777	0.950603	3.94562	1.10172	1.84747
		ANOVA		p-value
				0.003
		Tukey-Kramer	Statistics	p-value
		C-sham,C-ope	ns	0.101
		C-sham,1-sham	ns	>0.999
		C-sham,1-ope	*	0.023
		C-sham,L-sham	ns	0.995
		C-sham,L-ope	ns	0.957
		C-ope,1-sham	ns	0.067
		C-ope,1-ope	ns	0.988
		C-ope,L-sham	*	0.041
		C-ope,L-ope	ns	0.363
		1-sham,1-ope	*	0.013
		1-sham,L-sham	ns	0.995
		1-sham,L-ope	ns	0.934
		1-ope,L-sham	**	0.009
		1-ope,L-ope	ns	0.114
		L-sham,L-ope	ns	0.763
