# Supplementary material for: Sustained expression of HeyL is critical for the proliferation of muscle stem cells in overloaded muscle
Source: eLife. 2019 Sep 23;8:e48284. doi: 10.7554/eLife.48284 (PMC6768661; doi:10.7554/eLife.48284)
Supplement: Figure 4—figure supplement 2—source data 1. [file elife-48284-fig4-figsupp2-data1.xlsx]

## Sheet: FIgure4-figure sup2
A
M-cadherin + cells
		Cont	LKO
	Exp1	160.333	118.333
		86
	Exp2	169	212
			89.6667
			119.333
	average	138.444	134.833
	SD	45.6245	53.2517
		F-test	0.899663
			Student
		p-value	0.928818
		Statistics	N.S
B
% of eMyHC area		Cont	LKO
	Exp1	31.0817	26.32
		31.6315
	Exp2	23.5738	26.7651
			24.9383
			20.6348
	Exp3	29.7682	20.4407
			29.8793
	average	29.0138	24.8297
	SD	3.70997	3.69694
		F-test	0.924626
			Student
		p-value	0.118049
		Statistics	N.S
