# Supplementary material for: Sustained expression of HeyL is critical for the proliferation of muscle stem cells in overloaded muscle
Source: eLife. 2019 Sep 23;8:e48284. doi: 10.7554/eLife.48284 (PMC6768661; doi:10.7554/eLife.48284)
Supplement: Figure 4—figure supplement 3—source data 1. [file elife-48284-fig4-figsupp3-data1.xlsx]

## Sheet: Figure4-figure sup3
B
	Cont		HeyL KO
	Day0	Day2	Day0	Day2
Ki67-, MyoD-		0		0
Ki67+, MyoD-		3		1
Ki67-, MyoD+		0		0
Ki67+, MyoD+		232		101
total		235		102
fiber count		19		10
C
	Cont		HeyL KO
	Day0	Day2	Day0	Day2
total MuSC number	86	210	49	113
fiber count	21	20	15	12
MuSC per fiber	4.09524	10.5	3.26667	9.41667
