# Supplementary material for: Sustained expression of HeyL is critical for the proliferation of muscle stem cells in overloaded muscle
Source: eLife. 2019 Sep 23;8:e48284. doi: 10.7554/eLife.48284 (PMC6768661; doi:10.7554/eLife.48284)
Supplement: Figure 4—source data 1. — Experiment number corresponds to all results. [file elife-48284-fig4-data1.xlsx]

## Sheet: Fig4 
Fig4C
MyoD- Ki67+
		Cont		Hey1 KO		HeyL KO
		sham	ope	sham	ope	sham	ope
	Exp1			0	53.1073
				4.70588	56.0694
	Exp2	2.77778	59.9398	0.740741	48.11
	Exp3	0	54.3956			6.38298	33.0645
	Exp4					3.40909	40.367
						8.19672	45.4545
	Exp5	0	44.4444	2.06186	48.9209
		2.89855	55.3785
	Exp6	1.03093	54.023			0	35.6322
						1.63934	34.7222
	average	1.34145	53.6363	1.87712	51.5519	3.92563	37.8481
	SD	1.2793	5.05935	1.79241	3.22475	3.00617	4.51147
		ANOVA		p-value
				<0.001
		Tukey-Kramer	Statistics	p-value
		C-sham,C-ope	**	<0.001
		C-sham,1-sham	ns	>0.999
		C-sham,1-ope	**	<0.001
		C-sham,L-sham	ns	0.898
		C-sham,L-ope	**	<0.001
		C-ope,1-sham	**	<0.001
		C-ope,1-ope	ns	0.966
		C-ope,L-sham	**	<0.001
		C-ope,L-ope	**	<0.001
		1-sham,1-ope	**	<0.001
		1-sham,L-sham	ns	0.968
		1-sham,L-ope	**	<0.001
		1-ope,L-sham	**	<0.001
		1-ope,L-ope	**	<0.001
		L-sham,L-ope	**	<0.001
MyoD+ Ki67+
		Cont		Hey1 KO		HeyL KO
		sham	ope	sham	ope	sham	ope
	Exp1			0	24.2938
				3.52941	28.3237
	Exp2	0.925926	29.8193	0.740741	26.8041
	Exp3	3.63636	27.4725			4.25532	47.5806
	Exp4					4.54545	42.2018
						4.91803	38.6364
	Exp5	0	25.2137	0	25.1799
		0	29.4821
	Exp6	1.03093	20.6897			1.96078	32.1839
						1.63934	36.1111
	average	1.11864	26.5354	1.06754	26.1504	3.46379	39.3428
	SD	1.33315	3.35454	1.45318	1.54431	1.37833	5.25792
		ANOVA		p-value
				<0.001
		Tukey-Kramer	Statistics	p-value
		C-sham,C-ope	**	<0.001
		C-sham,1-sham	ns	>0.999
		C-sham,1-ope	**	<0.001
		C-sham,L-sham	ns	0.857
		C-sham,L-ope	**	<0.001
		C-ope,1-sham	**	<0.001
		C-ope,1-ope	ns	>0.999
		C-ope,L-sham	**	<0.001
		C-ope,L-ope	**	<0.001
		1-sham,1-ope	**	<0.001
		1-sham,L-sham	ns	0.875
		1-sham,L-ope	**	<0.001
		1-ope,L-sham	**	<0.001
		1-ope,L-ope	**	<0.001
		L-sham,L-ope	**	<0.001
Fig4D
Ki67+ MyoD+ MuSC/Ki67+ MyoD- MuSC
		Cont	Hey1 KO	Hey L KO
	Exp1		0.514706
			0.557143
	Exp2	0.567308	0.457447
	Exp3	0.532374		1.04545
	Exp4			0.85
				1.43902
	Exp5	0.505051	0.505155
		0.497487
	Exp6	0.382979		0.903226
				1.04
	average	0.49704	0.508613	1.05554
	SD	0.0620651	0.0354338	0.206325
		ANOVA		p-value
				<0.001
		Tukey-Kramer	Statistics	p-value
		Cont,Hey1 KO	ns	0.992
		Cont,Hey L KO	**	<0.001
		Hey1 KO,Hey L KO	**	<0.001
Fig4E
Pax7+/fiber
		Cont		Hey1 KO		HeyL KO
		sham	ope	sham	ope	sham	ope
	Exp1			3.65517	5.9
				3.26923	5.76667
	Exp2	4.69565	11.8571	5.4	12.125
	Exp3	4.23077	8.27273			2.47368	4.13333
	Exp4					2.93333	3.63333
						2.90476	3.66667
	Exp5	5.4	12.3158	3.46429	9.92857
		3.28571	8.36667
	Exp6	4.61905	7.56522			3	3.22222
						2.77273	5.14286
	average	4.44624	9.67551	3.94717	8.43006	2.8169	3.95968
	SD	0.692095	1.99323	0.849817	2.71076	0.186842	0.65822
		ANOVA		p-value
				<0.001
		Tukey-Kramer	Statistics	p-value
		C-sham,C-ope	**	<0.001
		C-sham,1-sham	ns	0.997
		C-sham,1-ope	*	0.014
		C-sham,L-sham	ns	0.606
		C-sham,L-ope	ns	0.996
		C-ope,1-sham	**	<0.001
		C-ope,1-ope	ns	0.853
		C-ope,L-sham	**	<0.001
		C-ope,L-ope	**	<0.001
		1-sham,1-ope	**	0.008
		1-sham,L-sham	ns	0.896
		1-sham,L-ope	ns	>0.999
		1-ope,L-sham	**	<0.001
		1-ope,L-ope	**	0.005
		L-sham,L-ope	ns	0.866
