# Supplementary material for: Sustained expression of HeyL is critical for the proliferation of muscle stem cells in overloaded muscle
Source: eLife. 2019 Sep 23;8:e48284. doi: 10.7554/eLife.48284 (PMC6768661; doi:10.7554/eLife.48284)
Supplement: Figure 5—figure supplement 1—source data 1. — Experiment number corresponds to all results. [file elife-48284-fig5-figsupp1-data1.xlsx]

## Sheet: Figure5-figure sup1
A
EdU+ Mionuclei/100 fibers
	Ope-7d	ope
		Cont	Hey1 KO	HeyL KO
	Exp1	4.83314	6.33484	3.34694
		6.85579	7.71028	1.96078
		8.93434	7.43381	1.8664
	Exp2	3.91265	4.54545	3.76712
				2.69107
	Exp3	7.35502	5.19731	0.895522
		12.1302	6.46288	2.15558
		7.40365
		5.52604
	average	7.11885	6.28076	2.38335
	SD	2.58171	1.23242	0.970337
		ANOVA		p-value
				<0.001
		Tukey-Kramer	Statistics	p-value
		Cont,Hey1 KO	ns	0.677
		Cont,HeyL KO	**	<0.001
		Hey1 KO,HeyL KO	**	0.003
B
nucleus/100 fibers
	Ope-7d	sham			ope
		Cont	Hey1 KO	HeyL KO	Cont	Hey1 KO	HeyL KO
	Exp1	84.9398	75.5906	68.0851	118.045	90.9677	68.6275
		66.4516	67.4603	78.3439	92.5676	95	92.9487
		60	80	82.0896	92.7152	84.4156	93.985
	Exp2	67.1233	80.8696	60.3687	102.976	103.2	67.8112
				70.303			80.1527
	Exp3	83.2168	64.2105	66.4179	70.7792	75.817	79.8611
		69.0789	62.3188	61.1702	84.5588	66.4	72.8916
		45.5497			71.5026
		74.8252			83.4532
	average	68.8982	71.7416	69.5398	89.5747	85.9667	79.4682
	SD	12.711	8.12613	8.18142	15.8181	13.3557	10.7218
		ANOVA		p-value
				0.006
		Tukey-Kramer	Statistics	p-value
		S-Cont,S-1KO	ns	0.998
		S-Cont,S-LKO	ns	>0.999
		S-Cont,O-Cont	*	0.017
		S-Cont,O-1KO	ns	0.116
		S-Cont,O-LKO	ns	0.541
		S-1KO,S-LKO	ns	>0.999
		S-1KO,O-Cont	ns	0.09
		S-1KO,O-1KO	ns	0.335
		S-1KO,O-LKO	ns	0.854
		S-LKO,O-Cont	*	0.03
		S-LKO,O-1KO	ns	0.164
		S-LKO,O-LKO	ns	0.638
		O-Cont,O-1KO	ns	0.993
		O-Cont,O-LKO	ns	0.588
		O-1KO,O-LKO	ns	0.924
