# Supplementary material for: Sustained expression of HeyL is critical for the proliferation of muscle stem cells in overloaded muscle
Source: eLife. 2019 Sep 23;8:e48284. doi: 10.7554/eLife.48284 (PMC6768661; doi:10.7554/eLife.48284)
Supplement: Figure 5—source data 1. — Experiment number corresponds to all results. [file elife-48284-fig5-data1.xlsx]

## Sheet: Fig5
Fig5C
Ope-4d	sham		ope
	Cont	HeyL KO	Cont	HeyL KO
Exp4	0	1	9	21
	0	0	17	9
Exp5	0	0	44	20
	0	2	23	9
average	0	0.75	23.25	14.75
SD	0	0.957427	14.975	6.65207
	ANOVA		p-value
			0.004
	Tukey-Kramer	Statistics	p-value
	S-Cont,S-LKO	ns	>0.999
	S-Cont,O-WT	**	0.008
	S-Cont,O-LKO	ns	0.103
	S-LKO,O-Cont	*	0.01
	S-LKO,O-LKO	ns	0.127
	O-Cont,O-LKO	ns	0.486
Ope-7d	sham			ope
	Cont	Hey1 KO	HeyL KO	Cont	Hey1 KO	HeyL KO
Exp1	0	0	0	42	56	41
	0	0	0	58	66	21
	0	0	0	83	73	19
Exp2	0	0	0	43	40	44
			0			25
Exp3	1	0	0	52	54	9
	0	0	0	123	74	23
	0			73
	0			52
average	0.125	0	0	65.75	60.5	26
SD	0.447214	0	0	16.6823	12.5778	11.6619
	ANOVA		p-value
			<0.001
	Tukey-Kramer	Statistics	p-value
	S-Cont,S-1KO	ns	>0.999
	S-Cont,S-LKO	ns	>0.999
	S-Cont,O-Cont	**	<0.001
	S-Cont,O-1KO	**	<0.001
	S-Cont,O-LKO	*	0.011
	S-1KO,S-LKO	ns	>0.999
	S-1KO,O-Cont	**	<0.001
	S-1KO,O-1KO	**	<0.001
	S-1KO,O-LKO	*	0.021
	S-LKO,O-Cont	**	<0.001
	S-LKO,O-1KO	**	<0.001
	S-LKO,O-LKO	*	0.014
	O-Cont,O-1KO	ns	0.981
	O-Cont,O-LKO	**	<0.001
	O-1KO,O-LKO	**	<0.001
Fig5D	% 0f Ope muscle/sham muscle
	Cont	Hey1 KO	HeyL KO
Exp1	133.548	127.044	139.326
	134.058	150.588	120
	137.908	137.273	137.267
Exp2	136.986	133.548	156.209
			147.143
Exp3	146.226	183.158	109.244
	137.107	156.944	146.939
	146.512
	136.97
average	138.664	148.093	136.59
SD	4.99773	20.4245	16.5044
	ANOVA		p-value
			0.352
	Bonferroni/Dunn	Statistics	p-value
	Cont,Hey1 KO	ns	0.752
	Cont,HeyL KO	ns	>0.999
	Hey1 KO,HeyL KO	ns	0.531
