# Supplementary material for: Sustained expression of HeyL is critical for the proliferation of muscle stem cells in overloaded muscle
Source: eLife. 2019 Sep 23;8:e48284. doi: 10.7554/eLife.48284 (PMC6768661; doi:10.7554/eLife.48284)
Supplement: Figure 6—figure supplement 1—source data 1. — Experiment number corresponds to Figure 6—source data 1. [file elife-48284-fig6-figsupp1-data1.xlsx]

## Sheet: Figure6-figure sup1
nucleus/100 fibers
		sham		ope
		Cont	HeyL KO	Cont	HeyL KO
	Exp1		128.082		142.276
	Exp2	105.946	112.319	148.148	159.006
			106.349		108.209
	Exp3	119.82	101.734	131.897	142.857
		102.459	82.1656	213.636	142.991
		94.8387	113.115	114.474	118.692
			106.918		130.714
			142.742		154.082
			131.298		108.491
			107.576		103.125
	average	105.766	113.23	152.039	131.044
	SD	10.4544	17.1112	43.3061	20.2301
		ANOVA		p-value
				0.019
		Tukey-Kramer	Statistics	p-value
		S-Cont,S-LKO	ns	0.943
		S-Cont,O-Cont	*	0.037
		S-Cont,O-LKO	ns	0.259
		S-LKO,O-Cont	*	0.037
		S-LKO,O-LKO	ns	0.316
		O-Cont,O-LKO	ns	0.414
