# Supplementary material for: Sustained expression of HeyL is critical for the proliferation of muscle stem cells in overloaded muscle
Source: eLife. 2019 Sep 23;8:e48284. doi: 10.7554/eLife.48284 (PMC6768661; doi:10.7554/eLife.48284)
Supplement: Figure 6—source data 1. — Experiment number corresponds to all results. [file elife-48284-fig6-data1.xlsx]

## Sheet: Fig6
Fig6B
plantaris mg/g BW
		sham		ope
		Cont	HeyL KO	Cont	HeyL KO
	Exp1		0.675134		1.1631
	Exp2	0.619818	0.580913	1.23569	0.93361
			0.58309		0.936589
	Exp3	0.626832	0.659362	1.05778	1.1777
		0.638337	0.589587	1.20372	1.04364
		0.70372	0.556125	1.53348	0.852074
			0.654889		1.1213
			0.702448		1.13309
			0.680787		1.24433
			0.628566		1.05695
	average	0.647177	0.63109	1.25767	1.06624
	SD	0.0384607	0.0505939	0.199517	0.125559
		ANOVA		p-value
				<0.001
		Tukey-Kramer	Statistics	p-value
		S-Cont,S-LKO	ns	0.995
		S-Cont,O-Cont	**	<0.001
		S-Cont,O-LKO	**	<0.001
		S-LKO,O-Cont	**	<0.001
		S-LKO,O-LKO	**	<0.001
		O-Cont,O-LKO	*	0.033
Fig6D
Myofiber CSA (um2)
		sham		ope
		Cont	HeyL KO	Cont	HeyL KO
	Exp1		1028.1		1240.13
	Exp2	855.714	1069.31	1946.88	1026.89
			1196.88		1535.84
	Exp3	1350.14	923.705	1487.1	1782.15
		1273.89	1006.23	2214.66	1476.98
		1029.42	1271.42	1528.57	1365.53
			1002.15		1508.38
			1232.92		1543.38
			1276.92		1564.75
			1152.74		1389.59
	average	1127.29	1116.04	1794.3	1443.36
	SD	226.928	126.273	348.791	204.702
		ANOVA		p-value
				<0.001
		Tukey-Kramer	Statistics	p-value
		S-Cont,S-LKO	ns	>0.999
		S-Cont,O-Cont	**	<0.001
		S-Cont,O-LKO	ns	0.075
		S-LKO,O-Cont	**	<0.001
		S-LKO,O-LKO	**	0.009
		O-Cont,O-LKO	*	0.041
