# Supplementary material for: Sustained expression of HeyL is critical for the proliferation of muscle stem cells in overloaded muscle
Source: eLife. 2019 Sep 23;8:e48284. doi: 10.7554/eLife.48284 (PMC6768661; doi:10.7554/eLife.48284)
Supplement: Figure 7—figure supplement 1—source data 1. [file elife-48284-fig7-figsupp1-data1.xlsx]

## Sheet: Figure7-figure sup1
B
%EdU+ /Pax7+
		Sham				Ope
		Day2	Day4	Day6	Day7	Day2	Day4	Day6	Day7
		0	0	0	0	0	12.5	61.1111	44
		0	0	0	0	0	55.5556	45.8333	55.3191
		3.7037	0	0	0	0	52	54.3478	50
			0		0		64.4068		51.0638
	average	1.23457	0	0	0	0	40.0185	53.7641	49.773
	SD	2.13833	0	0	0	0	23.898	7.6556	5.66299
C
#EdU+ myonuclei
		Sham				Ope
		Day2	Day4	Day7	Day14	Day2	Day4	Day7	Day14
						0	2	3.66667	9.11111
						0	1.88889	7.55556	21.6667
						0	1.88889	7.22222	16.8889
							1.55556	6.11111	12.4286
	average	#DIV/0!	#DIV/0!	#DIV/0!	#DIV/0!	0	1.83333	6.13889	15.0238
	SD	#DIV/0!	#DIV/0!	#DIV/0!	#DIV/0!	0	0.19245	1.76004	5.45592
