# Supplementary figures and images for: Sustained expression of HeyL is critical for the proliferation of muscle stem cells in overloaded muscle
Source: eLife journal article supplement (doi:10.7554/elife.48284), 2019-09-23

## Figure 4-figure supplement 3

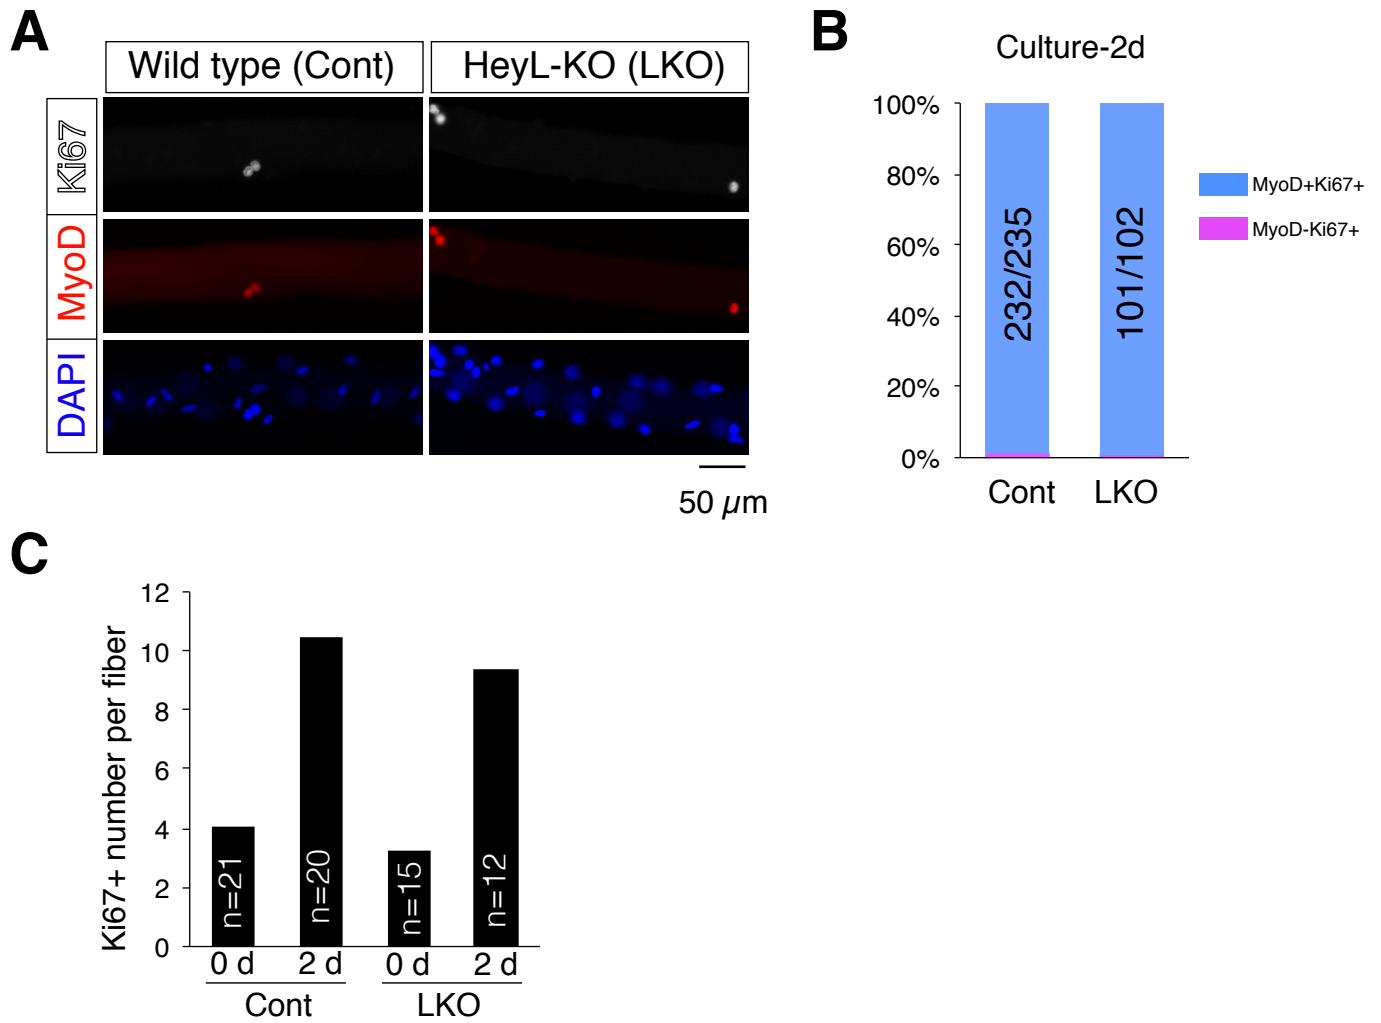

Supplement: supp [file elife-48284-supp-v1.zip]

**Figure 5-figure supplement 1**

**A**

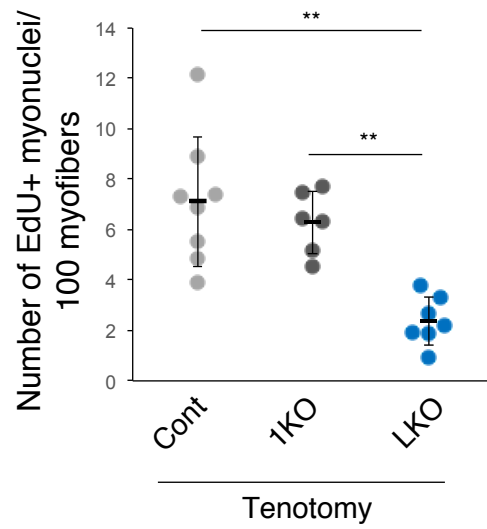

**B**

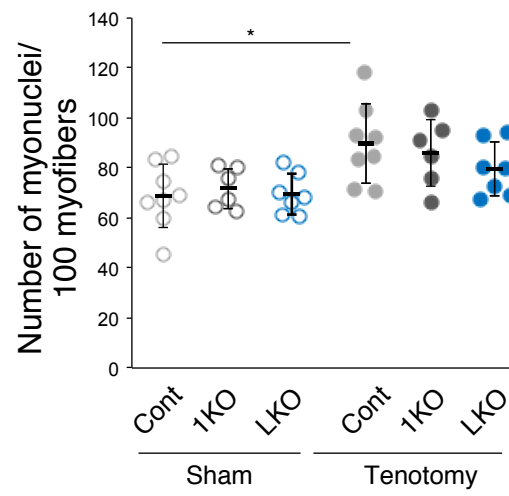

Supplement: supp [file elife-48284-supp-v1.zip]

**Figure 6-figure supplement 1**

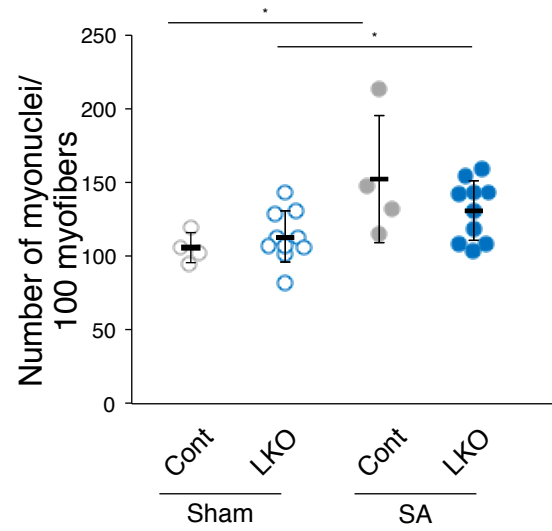

Supplement: supp [file elife-48284-supp-v1.zip]

## Figure 7-figure supplement 1

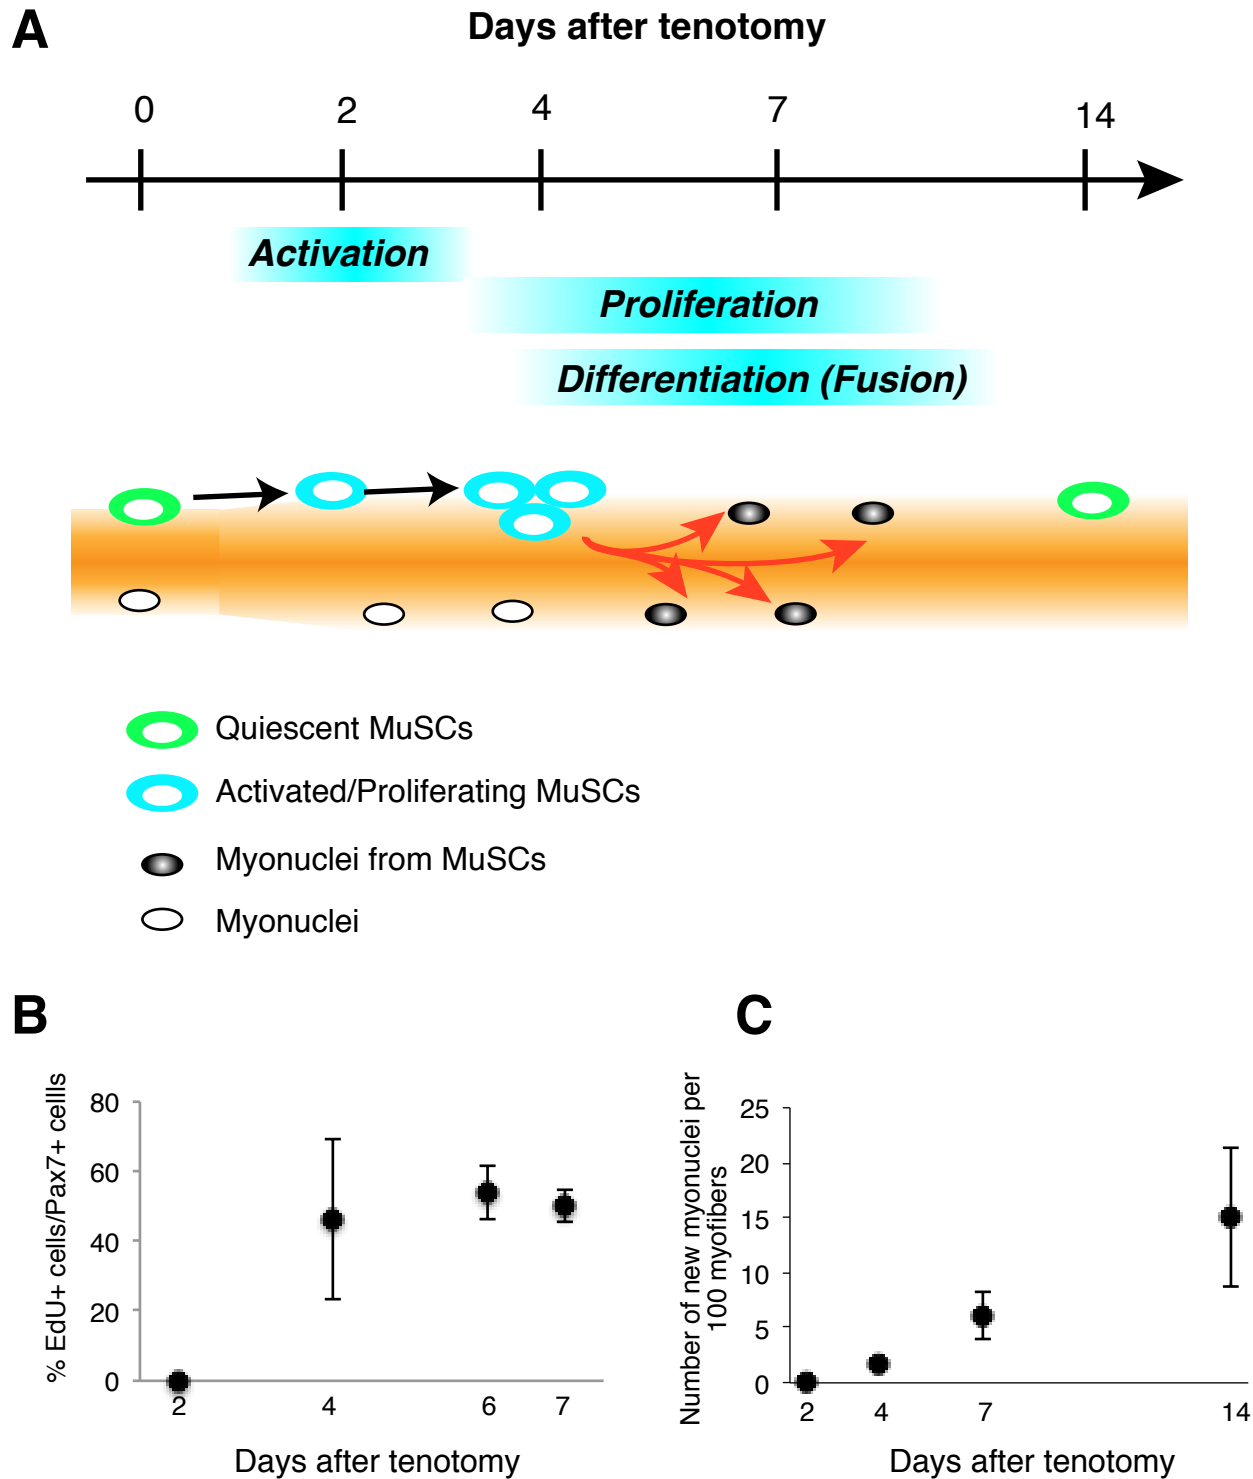

Supplement: supp [file elife-48284-supp-v1.zip]

## Figure 4-figure supplement 2

**A**

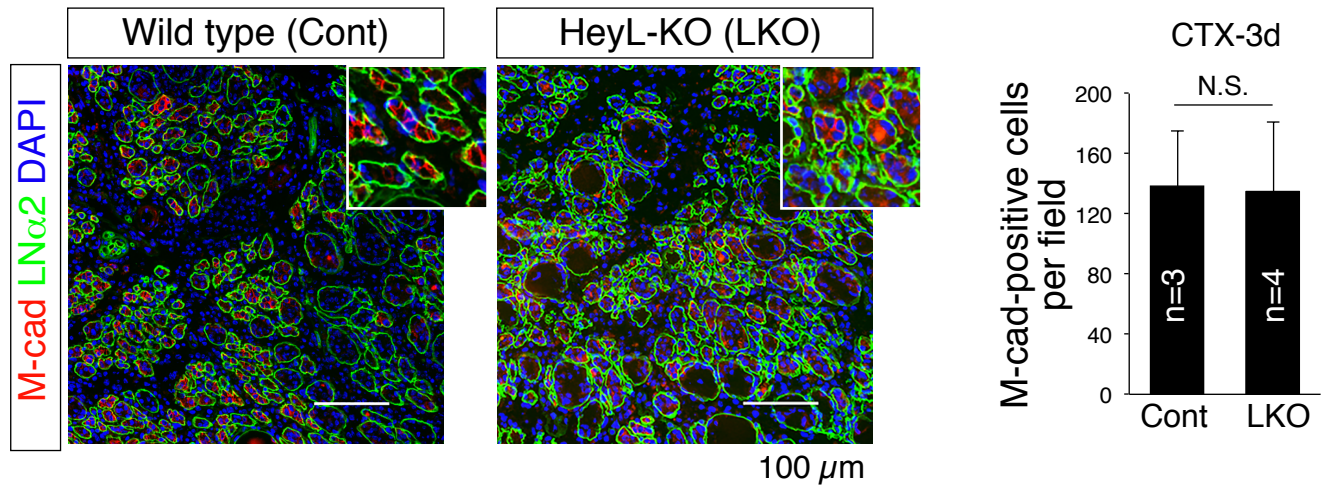

**B**

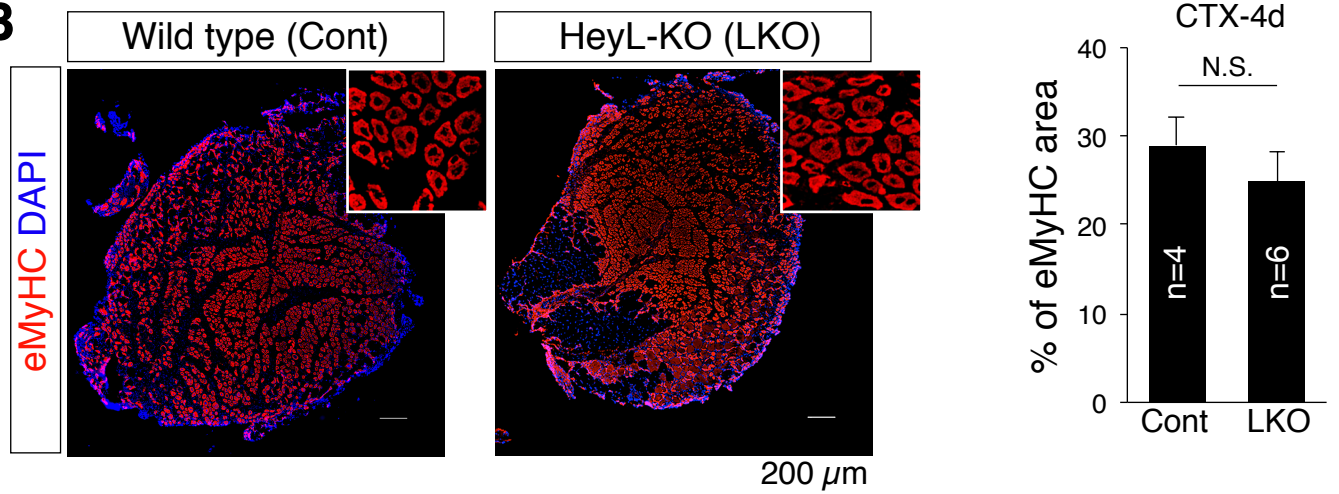

Supplement: supp [file elife-48284-supp-v1.zip]

**Figure 1-figure supplement 1**

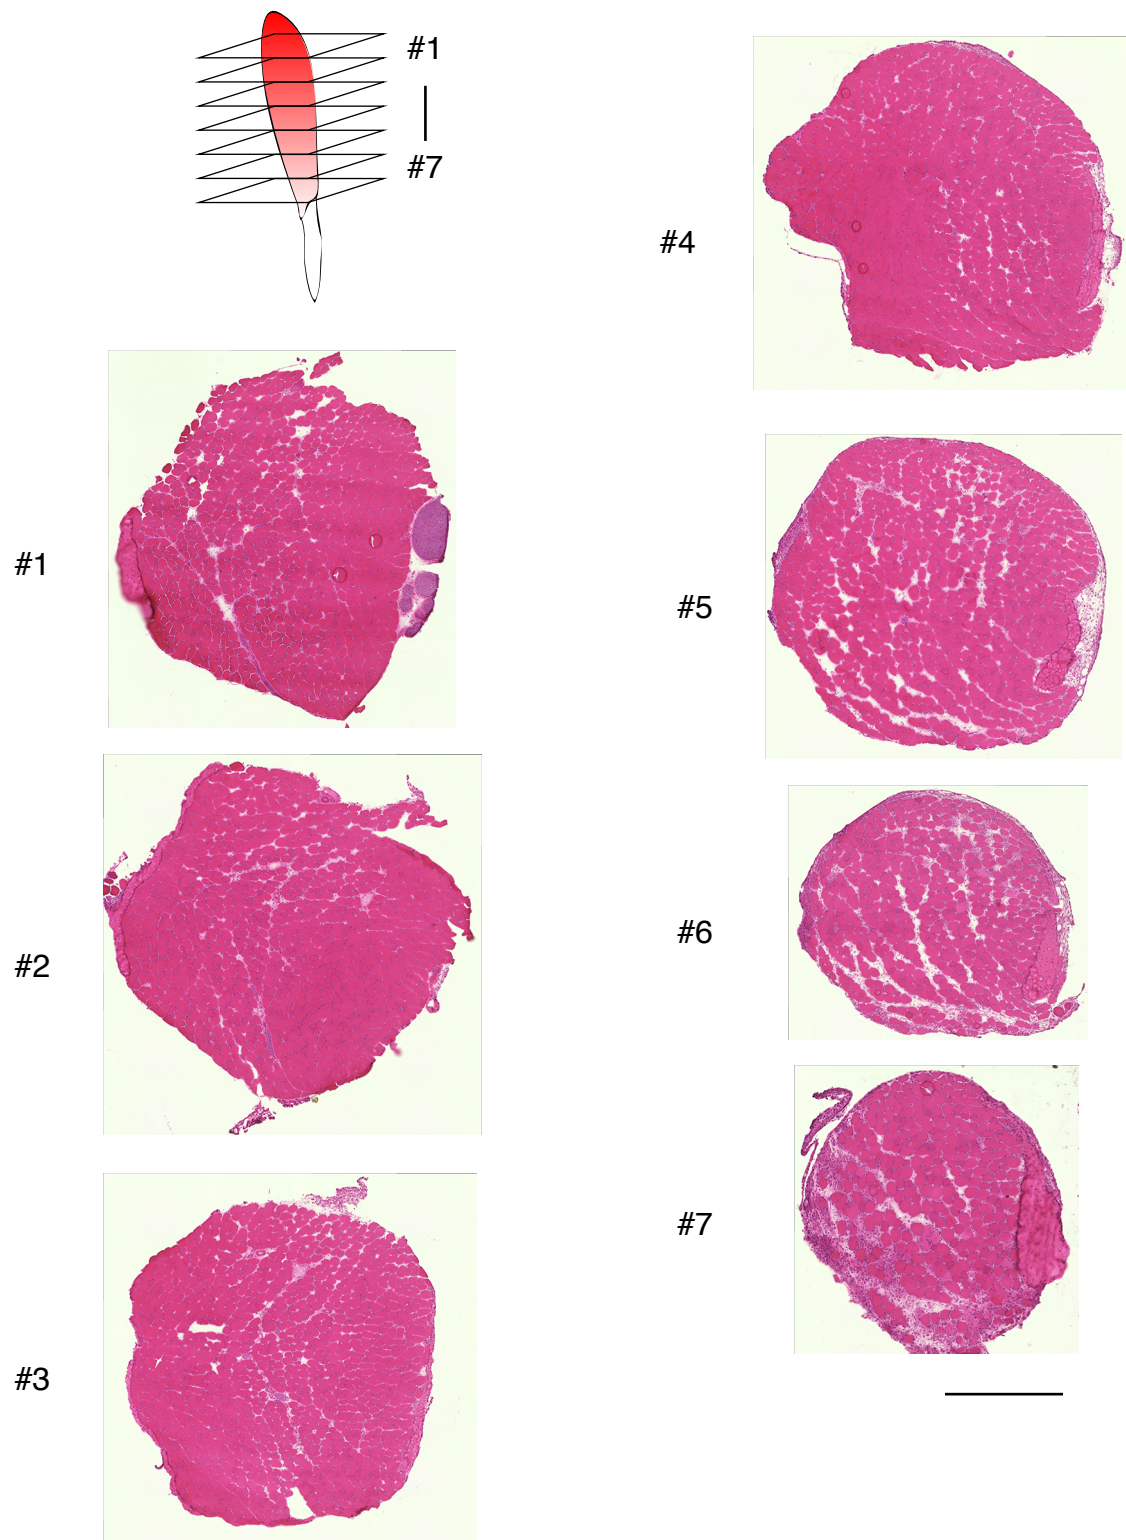

Supplement: supp [file elife-48284-supp-v1.zip]

# Figure 4-figure supplement 1

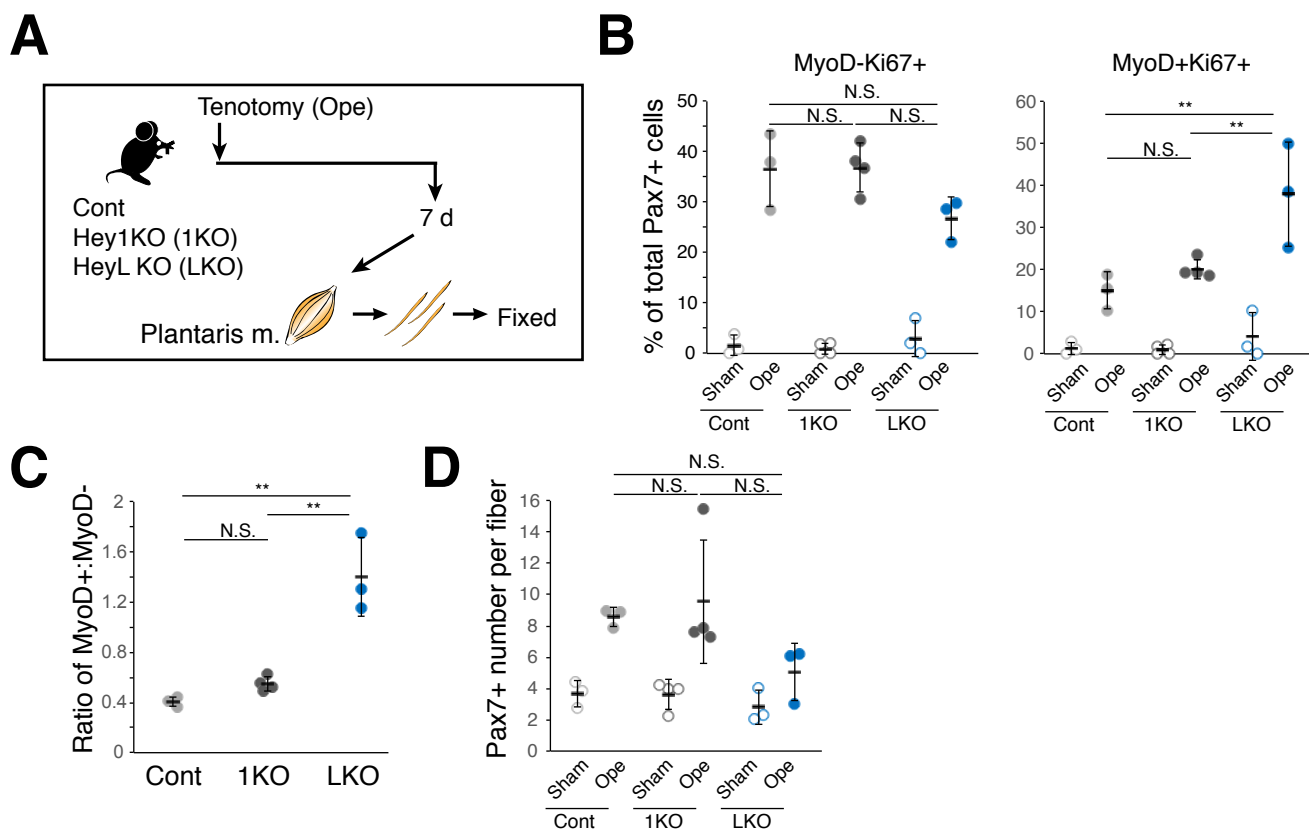

Supplement: supp [file elife-48284-supp-v1.zip]

## Figure 3-figure supplement 1

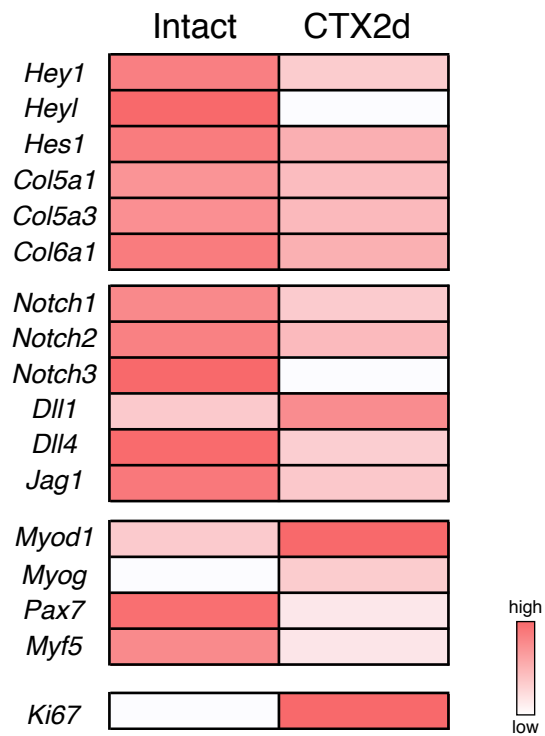

Supplement: supp [file elife-48284-supp-v1.zip]
